# Supplementary material for: Analysis of low-volatility pesticides in cabbage by high temperature comprehensive two-dimensional gas chromatography
Source: Royal Society of Chemistry journal article supplement (doi:10.1039/d2ay00998f), 2022-01-01
Supplement: d2ay00998f1.pdf [file d2ay00998f1.pdf]

## Supplementary material

**Manuscript Title:** Analysis of low volatility pesticides in cabbage by high temperature comprehensive two-dimensional gas chromatography

*Pannipa Janta*<sup>a</sup>, *Bussaba Wongla*<sup>b</sup>, *Wilai Phayoonhong*<sup>b</sup>, *Oraphan Intarapanich*<sup>b</sup>,

*Sirirat Kokpol*<sup>a,b</sup>, *Sugunya Mahatheeranont*<sup>c,\*</sup>, *Chadin Kulsing*<sup>a,b,d,\*</sup>

<sup>a</sup> Department of Chemistry, Faculty of Science, Chulalongkorn University, Bangkok 10330, Thailand

<sup>b</sup> Food Research and Testing Laboratory, Faculty of Science, Chulalongkorn University, Bangkok 10330, Thailand

<sup>c</sup> Department of Chemistry, Faculty of Science, Chiang Mai University, Chiang Mai 50200, Thailand

<sup>d</sup> Special Task Force for Activating Research (STAR) in Flavor Science, Chulalongkorn University, Phayatai Rd., Wangmai, Pathumwan, Bangkok 10330, Thailand

\* **Corresponding Author:** Tel: +66802971178; Email: ckulsing@gmail.com

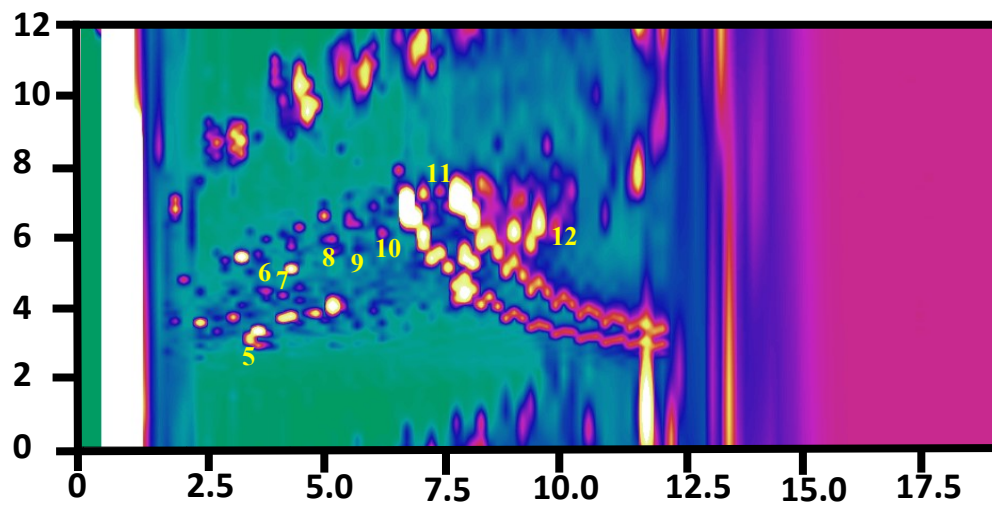

**Fig. S1.** The contour plots obtained from analysis of the 8 pesticides (5-12) spiked into the cabbage samples with the final concentration of 5 mg/kg using the selected HTGC×GC method: the constant trap temperature of 10 °C, initial oven temperature of 80 °C, ramp rate of 15 °C/min and  $P_M$  of 12 s.

### Spiked sample at low concentration (10 times)

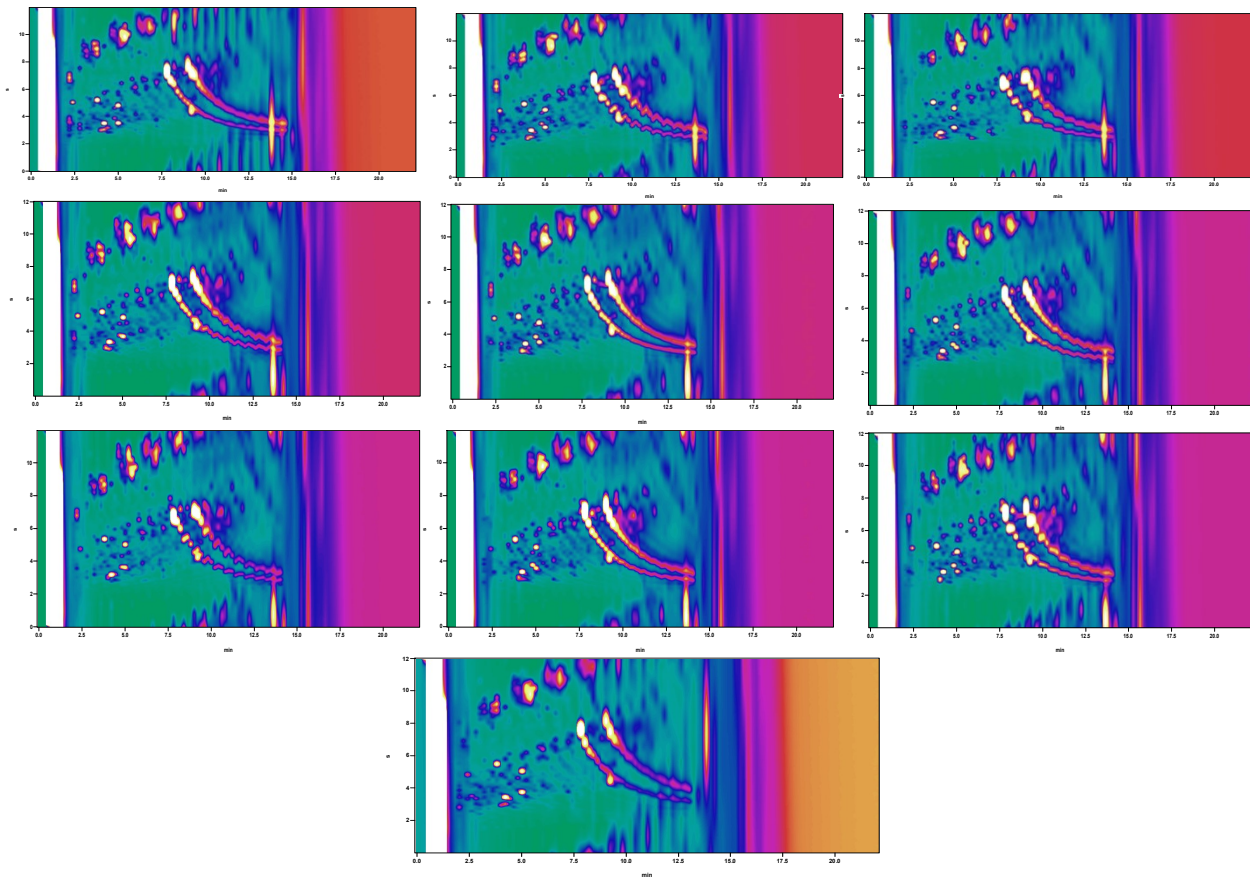

**Fig. S2.** The contour plots obtained from 10 repeated analyses of the 8 pesticides (5-12) spiked into the cabbage samples with the final concentration of 0.5 mg/kg using the selected HTGC×GC method.

**Table S1.** Validation of the HTGC×GC-FID for the 8 pesticides.

| Peak No. | Compound     | LOD (ppm) | Calibration curve                            | Recovery (%) (at 0.5 mg/kg) (n = 3) | S/N at 0.1 ppm | Precision |           |
|----------|--------------|-----------|----------------------------------------------|-------------------------------------|----------------|-----------|-----------|
|          |              |           |                                              |                                     |                | Intra day | Inter day |
| 5        | Metolcarb    | 0.0385    | $y = 13.487x + 0.2578$<br>( $R^2 = 0.9848$ ) | 93.61±6.37                          | 4.26           | 7.39      | 10.20     |
| 6        | Isoproc carb | 0.0910    | $y = 5.4895x + 0.1849$<br>( $R^2 = 0.9985$ ) | 97.95±0.31                          | 8.52           | 6.64      | 5.14      |
| 7        | Methiocarb   | 0.0878    | $y = 2.918x + 0.9949$<br>( $R^2 = 0.9947$ )  | 88.29±0.30                          | 16.7           | 4.45      | 2.52      |
| 8        | Carbofuran   | 0.0098    | $y = 10.567x + 1.2333$<br>( $R^2 = 0.9878$ ) | 102.62±1.85                         | 18.2           | 5.28      | 2.30      |
| 9        | Heptachlor   | 0.0179    | $y = 6.7585x + 0.2105$<br>( $R^2 = 0.9926$ ) | 97.35±0.26                          | 15.7           | 1.89      | 8.16      |
| 10       | Chlorpyrifos | 0.0239    | $y = 14.523x + 0.1275$<br>( $R^2 = 0.9909$ ) | 90.72±1.77                          | 26.9           | 3.47      | 2.57      |
| 11       | Dicofol      | 0.0138    | $y = 21.769x + 1.2632$<br>( $R^2 = 0.9891$ ) | 96.11±0.21                          | 25.1           | 9.80      | 3.71      |
| 12       | Permethrin   | 0.0139    | $y = 12.465x + 0.3671$<br>( $R^2 = 0.9728$ ) | 95.71±0.67                          | 29.1           | 6.03      | 3.43      |

**Table S2.** Method detection limit (mg/kg) of the twelve pesticides between experiment and literature.

| No. | Name               | Method detection limit (mg/kg) |                                       |
|-----|--------------------|--------------------------------|---------------------------------------|
|     |                    | This work                      | MRL*                                  |
| 1   | 4,4'-DDT           | 0.01                           | 0.2 (carrot) <sup>a</sup>             |
| 2   | β-endosulfan       | 0.01                           | 1 (cucumber) <sup>b</sup>             |
| 3   | Endosulfan sulfate | 0.02                           | 1 (cucumber) <sup>b</sup>             |
| 4   | Endrin             | 0.04                           | 0.05 (fruiting vegetables, cucurbits) |
| 5   | Metolcarb          | 0.04                           | No data                               |
| 6   | Isoproc carb       | 0.09                           | No data                               |
| 7   | Methiocarb         | 0.09                           | 0.1 (cabbages, head)                  |
| 8   | Carbofuran         | 0.01                           | 0.01 (banana)                         |
| 9   | Heptachlor         | 0.02                           | 0.02 (cereal grains)                  |
| 10  | Chlorpyrifos       | 0.02                           | 1 (cabbages, head)                    |
| 11  | Dicofol            | 0.01                           | 0.1 (Spices, fruits and berries)      |
| 12  | Permethrin         | 0.01                           | 5 (cabbages, head)                    |

\* Reference from <http://www.fao.org/fao-who-codexalimentarius/about-codex/en/>

<sup>a</sup> Sum of p,p'-DDT, o,p'-DDT, p,p'-DDE and p,p'-TDE (DDD)

<sup>b</sup> Sum of α-endosulfan, β-endosulfan and endosulfan sulfate

**Table S3.** The average chromatographic parameters; peak times and peak width in <sup>1</sup>D and <sup>2</sup>D separations (<sup>1</sup>t<sub>R</sub> (min), <sup>2</sup>t<sub>R</sub> (s), <sup>1</sup>W (min) and <sup>2</sup>W (s)) of each target pesticide (*n*=5) with the concentration of 0.5 mg/L using the initial oven temperature of 80°C and temperature ramp rate of 15°C/min. The relative standard deviations of <sup>1</sup>t<sub>R</sub>, <sup>2</sup>t<sub>R</sub>, <sup>1</sup>W and <sup>2</sup>W were within the ranges of 0.0006 - 0.0045 %, 0.0330 - 0.2700 %, 0.0024 - 0.0150 % and 0.0004 - 0.0033 %, respectively.

| Compound           | Average parameter           |                             |                |                |
|--------------------|-----------------------------|-----------------------------|----------------|----------------|
|                    | <sup>1</sup> t <sub>R</sub> | <sup>2</sup> t <sub>R</sub> | <sup>1</sup> W | <sup>2</sup> W |
| 4,4'-DDT           | 9.67                        | 4.43                        | 0.05           | 0.01           |
| Endrin             | 10.69                       | 5.15                        | 0.03           | 0.01           |
| β-endosulfan       | 10.49                       | 5.56                        | 0.05           | 0.01           |
| Endosulfan sulfate | 7.66                        | 3.88                        | 0.03           | 0.02           |

**Table S4.** The average <sup>2</sup>W at different LMCS trapping temperature programs; constant trap and stepped temperature, of the standard mixture (100 mg/L each) and extracted cabbage sample using the initial oven temperature of 80°C, temperature ramp rate of 15°C/min and modulation period (*P*<sub>M</sub>) of 12 s.

| Condition                          | Average <sup>2</sup> W (min) |                   |
|------------------------------------|------------------------------|-------------------|
|                                    | Standard mixture             | Extracted cabbage |
| Constant trap temperature of 10 °C | 0.015                        | 0.020             |
| Stepped trap temperature           | 0.027                        | 0.026             |

**Table S5.** The average peak height at different initial oven temperatures of the standard mixture (100 mg/L each) and the extracted cabbage sample using temperature ramp rate of 15 °C/min, modulation period (*P*<sub>M</sub>) of 12 s and constant trap temperature of 10 °C for <sup>2</sup>W experiment, respectively.

| Initial oven temperature (°C) | Average peak height (pA) |                   |
|-------------------------------|--------------------------|-------------------|
|                               | Standard mixture         | Extracted cabbage |
| 40                            | 38.7                     | 21.9              |
| 80                            | 87.8                     | 22.7              |
| 120                           | 42.8                     | 29.3              |

**Table S6.** The average peak height at different temperature ramp rate of the standard mixture (100 mg/L each) and extracted cabbage sample using initial oven temperature of 80 °C, modulation period (*P*<sub>M</sub>) of 12 s and constant trap temperature of 10 °C for <sup>2</sup>W experiment, respectively.

| Temperature ramp rate (°C/min) | Average peak height (pA) |                   |
|--------------------------------|--------------------------|-------------------|
|                                | Standard mixture         | Extracted cabbage |
| 4                              | 16.9                     | 11.3              |
| 8                              | 51.0                     | 12.2              |
| 15                             | 87.8                     | 22.7              |

**Table S7.** The approximated <sup>1</sup>W, average <sup>2</sup>W and average peak heights at different *P*<sub>M</sub> of the standard mixture (100 mg/L each) and extracted cabbage sample using initial oven temperature of 80 °C, temperature ramp rate of 15 °C/min and constant trap temperature of 10 °C.

| $P_M$ (s) | Approximated<br>${}^1W$ (min) | Average ${}^2W$ (min) |                   | Average peak height<br>(pA) |                      |
|-----------|-------------------------------|-----------------------|-------------------|-----------------------------|----------------------|
|           |                               | Standard<br>mixture   | Extracted cabbage | Standard<br>mixture         | Extracted<br>cabbage |
| 8         | 0.133                         | 0.015                 | 0.023             | 73.4                        | 21.0                 |
| 12        | 0.200                         | 0.015                 | 0.025             | 87.8                        | 51.7                 |
